# Supplementary material for: UMI-Gen: A UMI-based read simulator for variant calling evaluation in paired-end sequencing NGS libraries
Source: PubMed Central journal article supplement — Comput Struct Biotechnol J. 2020 Aug 27;18:2270–80. doi: 10.1016/j.csbj.2020.08.011 (PMC7484502; doi:10.1016/j.csbj.2020.08.011), 2020-08-27
Supplement: mmc1.pdf [file mmc1.pdf]

Supplementary Materials for “UMI-Gen: a UMI-based reads simulator for variant calling evaluation in paired-end sequencing NGS libraries”

Vincent Sater    Pierre-Julien Vially    Thierry Lecroq  
 Philippe Ruminy    Caroline Bérard    Élise Prieur-Gaston    Fabrice Jardin

## 1 Tables

| Symbol | ASCII Code | Q-Score | Symbol | ASCII Code | Q-Score |
|--------|------------|---------|--------|------------|---------|
| !      | 33         | 0       | 6      | 54         | 21      |
| “      | 34         | 1       | 7      | 55         | 22      |
| #      | 35         | 2       | 8      | 56         | 23      |
| \$     | 36         | 3       | 9      | 57         | 24      |
| %      | 37         | 4       | :      | 58         | 25      |
| &      | 38         | 5       | ;      | 59         | 26      |
| ,      | 39         | 6       | <      | 60         | 27      |
| (      | 40         | 7       | =      | 61         | 28      |
| )      | 41         | 8       | >      | 62         | 29      |
| *      | 42         | 9       | ?      | 63         | 30      |
| +      | 43         | 10      | @      | 64         | 31      |
| ,      | 44         | 11      | A      | 65         | 32      |
| -      | 45         | 12      | B      | 66         | 33      |
| .      | 46         | 13      | C      | 67         | 34      |
| /      | 47         | 14      | D      | 68         | 35      |
| 0      | 48         | 15      | E      | 69         | 36      |
| 1      | 49         | 16      | F      | 70         | 37      |
| 2      | 50         | 17      | G      | 71         | 38      |
| 3      | 51         | 18      | H      | 72         | 39      |
| 4      | 52         | 19      | I      | 73         | 40      |
| 5      | 53         | 20      | J      | 74         | 41      |

Table S1: Quality scores encoding

| Parameter             | Type          | Required | Default                    |
|-----------------------|---------------|----------|----------------------------|
| --input (-i)          | list of files | YES      | NONE                       |
| --fasta (-f)          | file          | YES      | NONE                       |
| --bed (-b)            | file          | YES      | NONE                       |
| --pileup (-p)         | file          |          | NONE                       |
| --variants (-v)       | file          |          | NONE                       |
| --output (-o)         | dir           |          | ./                         |
| --name (-n)           | string        |          | sim.< <i>depth_value</i> > |
| --min_base_quality    | int           |          | 10                         |
| --min_read_quality    | int           |          | 20                         |
| --min_mapping_quality | int           |          | 20                         |
| --min_variant_umi     | int           |          | 10                         |
| --alpha               | float         |          | 0.05                       |
| --strand_bias_method  | string        |          | default                    |
| --max_strand_bias     | float         |          | 1                          |
| --max_hp_length       | int           |          | 7                          |
| --depth (-d)          | int           |          | 1000                       |
| --umi_length (-u)     | int           |          | 12                         |
| --read_length         | int           |          | 110                        |
| --max_noise_rate      | float         |          | 0.05                       |
| --amp_factor          | int           |          | 10                         |

Table S2: List of all UMI-Gen parameters. A detailed explication of each parameter is found in the tool documentation.

| Gene   | Number of regions | Gene     | Number of regions |
|--------|-------------------|----------|-------------------|
| ARID1A | 85                | GNA13    | 14                |
| B2M    | 6                 | ID3      | 6                 |
| BCL2   | 8                 | IRF4     | 22                |
| BRAF   | 2                 | MEF2B    | 21                |
| BTK    | 3                 | MYC      | 16                |
| CARD11 | 16                | MYD88    | 8                 |
| CCND3  | 15                | NOTCH1   | 19                |
| CD58   | 17                | NOTCH2   | 24                |
| CD79A  | 5                 | PIM1     | 14                |
| CD79B  | 4                 | PLCG2    | 16                |
| CDKN2A | 27                | PRDM1    | 33                |
| CDKN2B | 47                | SOCS1    | 8                 |
| CIITA  | 66                | STAT6    | 14                |
| CREBBP | 103               | TCF3     | 5                 |
| CXCR4  | 12                | TNFAIP3  | 31                |
| EP300  | 102               | TNFRSF14 | 16                |
| EZH2   | 5                 | TP53     | 24                |
| FOXP1  | 22                | XPO1     | 11                |

Table S3: Pan-lymphoma Panel: List of targeted regions per gene
